# Supplementary material
Source: PubMed Central journal article supplement (PMC8156831)
Supplement: mmc1.pdf [file mmc1.pdf]

SUPPLEMENTARY MATERIAL

Figure S1 (A, B). Forest plot of CFR among patients with solid or hematological malignancies and SARS-CoV-2 infection (sensitivity analysis, studies including at least 100 patients).

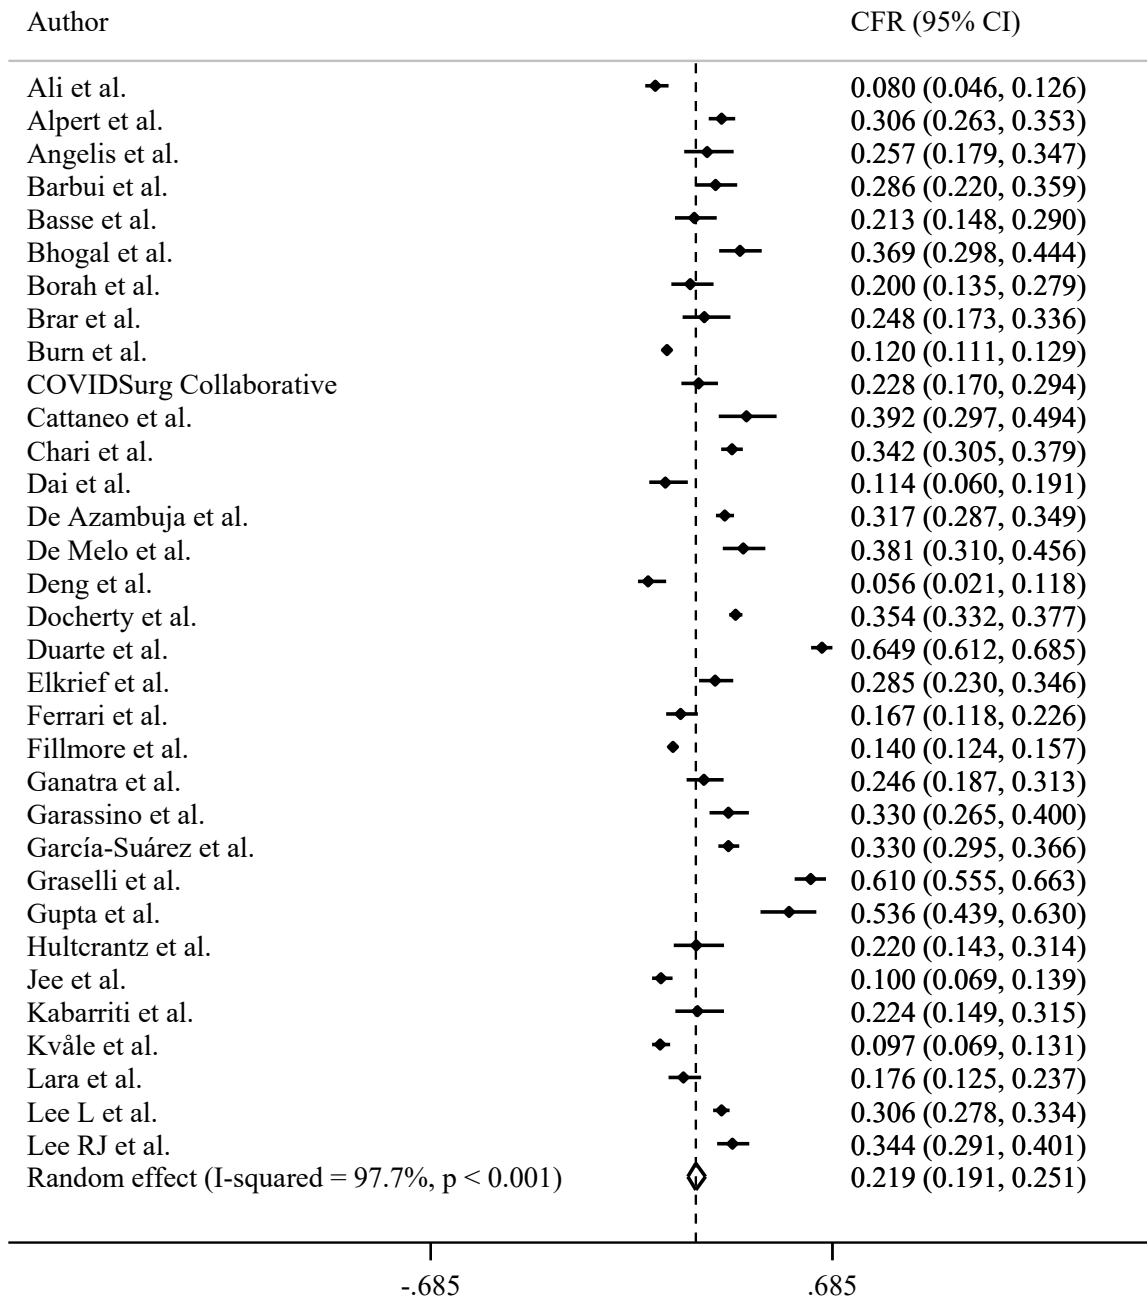

(A) Authors from A to L.

Abbreviations. CFR: case-fatality rate; 95% CI: 95% confidence interval.

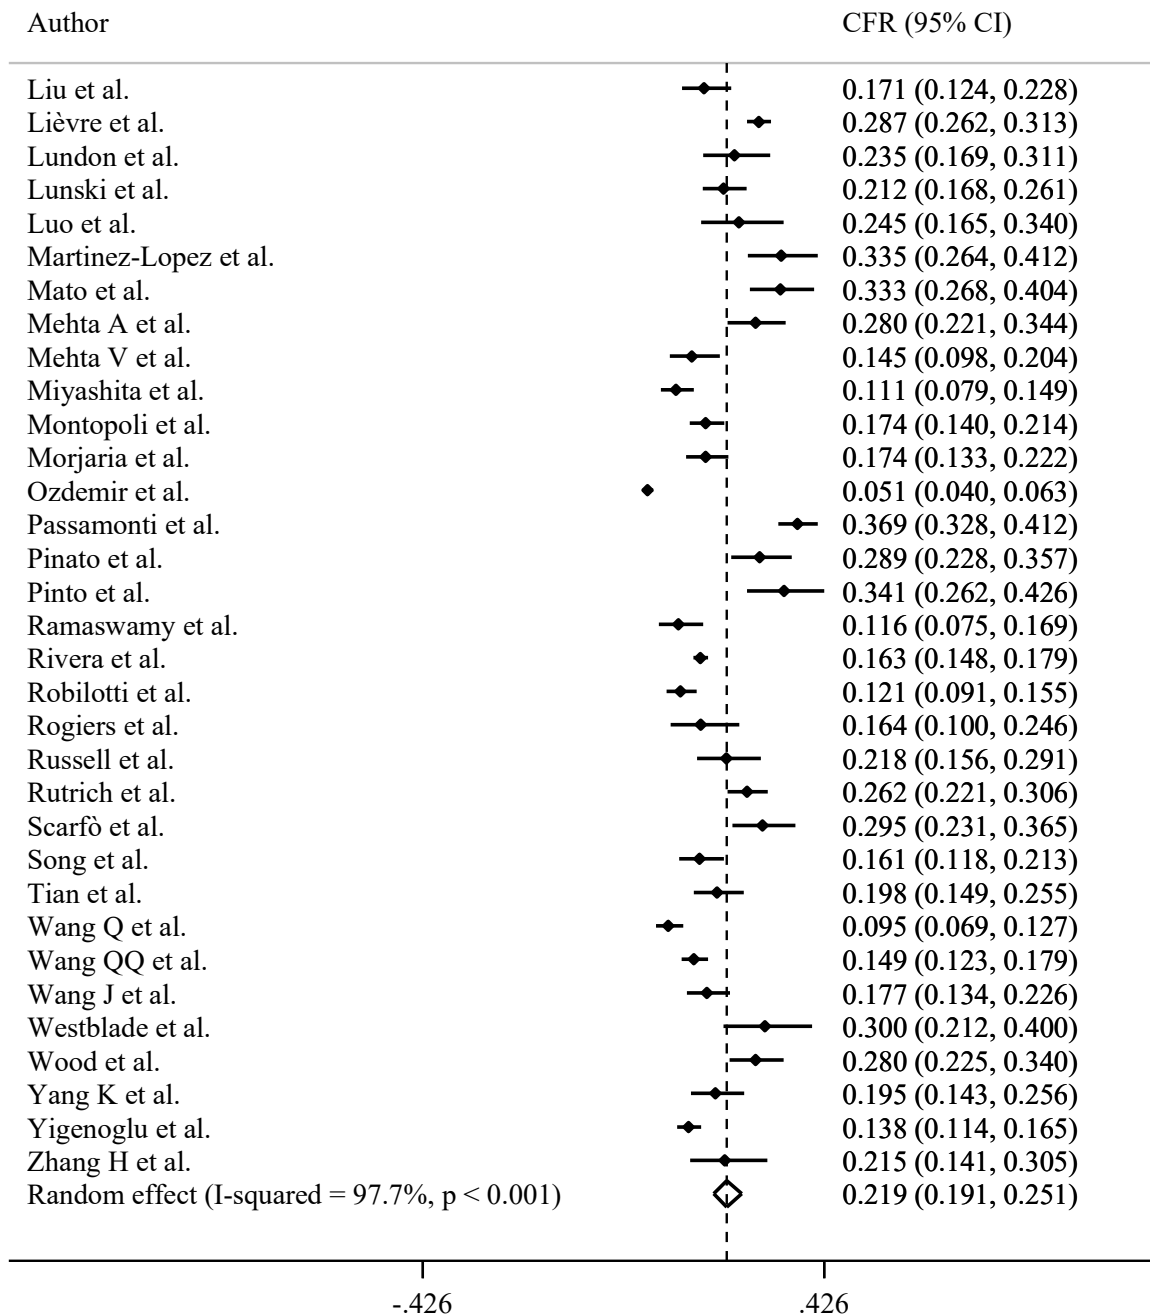

(B) Authors from L to Z.

*Abbreviations.* CFR: case-fatality rate; 95% CI: 95% confidence interval.

Figure S2. Forest plot of studies reporting the CFR among patients with lung cancer and SARS-CoV-2 infection (sensitivity analysis, studies including at least 100 patients).

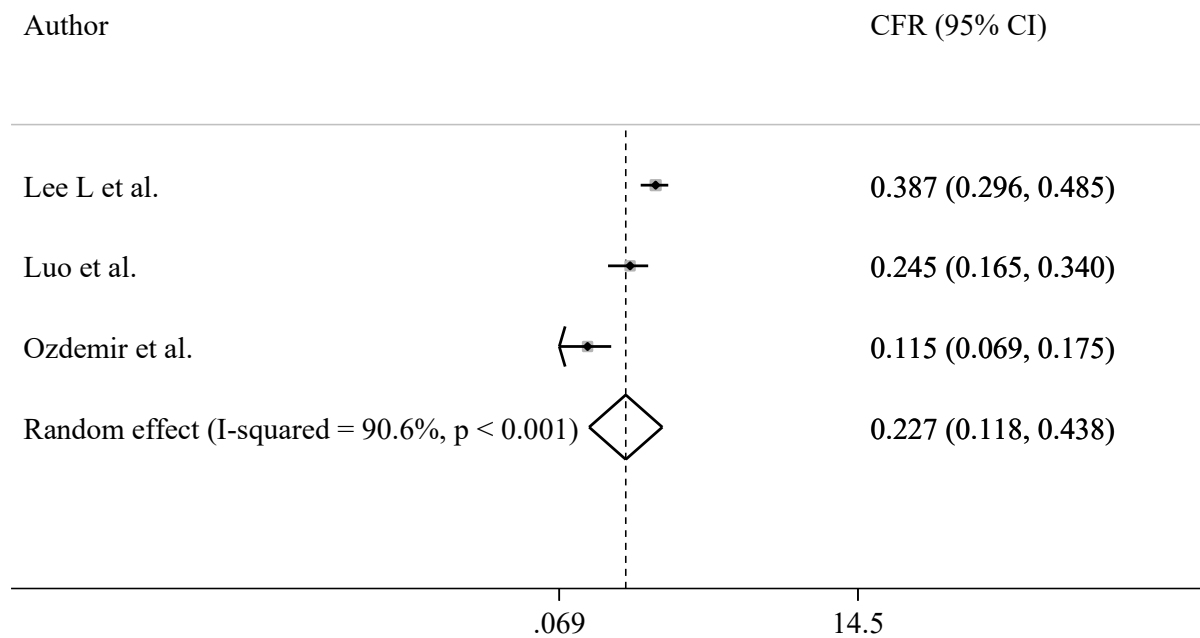

*Abbreviations.* CFR: case-fatality rate; 95% CI: 95% confidence interval.

Figure S3. Forest plot of studies reporting the CFR among patients with breast cancer and SARS-CoV-2 infection (sensitivity analysis, studies including at least 100 patients).

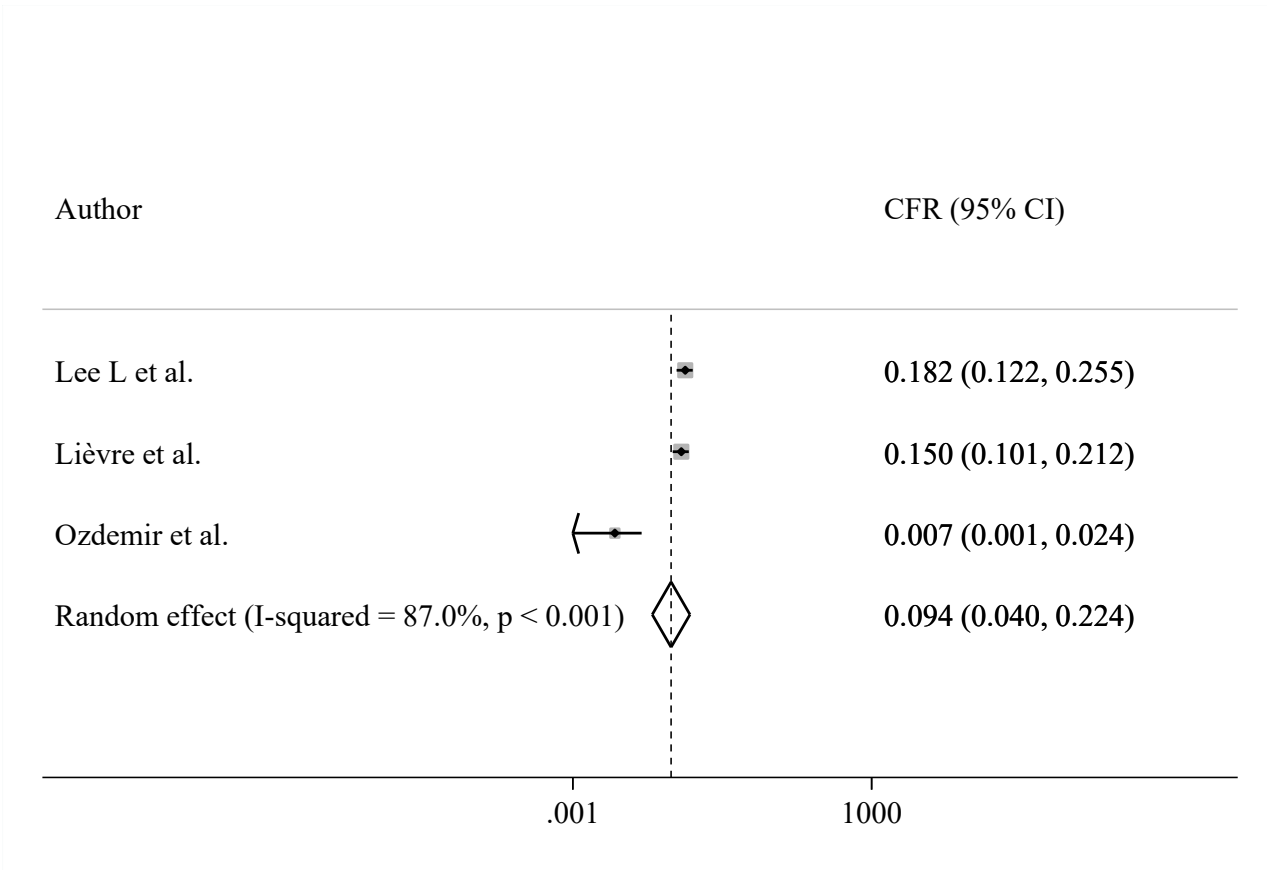

*Abbreviations.* CFR: case-fatality rate; 95% CI: 95% confidence interval.
